# Supplementary material for: Cell rearrangements, cell divisions and cell death in a migrating epithelial sheet in the abdomen of Drosophila
Source: Oxford University Press journal article supplement (doi:10.1242/dev.035410), 2009-06-19
Supplement: dev035410supptable1.pdf [file dev035410supptable1.pdf]

**Table S1. Division orientation ( $\vartheta$ ) and position of sister cells ( $\rho$ ) relative to the direction of movement in the A compartment, P compartment or both**

| Angle                        | Interval | Proportion (%)    | $\chi^2$  |
|------------------------------|----------|-------------------|-----------|
| $\vartheta$ (both)*          | 0°-29°   | 32.1              | $P=0.347$ |
|                              | 30°-60°  | 36.5              |           |
|                              | 61°-90°  | 31.3              |           |
| $\rho$ (both)*               | 0°-29°   | 49.4              | $P<0.001$ |
|                              | 30°-60°  | 28.9              |           |
|                              | 61°-90°  | 21.7              |           |
| $\vartheta$ (A) <sup>†</sup> | 0°-29°   | 34.5              | $P=0.367$ |
|                              | 30°-60°  | 35.4              |           |
|                              | 61°-90°  | 30.1              |           |
| $\rho$ (A) <sup>†</sup>      | 0°-29°   | 47.8 <sup>§</sup> | $P<0.001$ |
|                              | 30°-60°  | 28.9              |           |
|                              | 61°-90°  | 23.3              |           |
| $\vartheta$ (P) <sup>‡</sup> | 0°-29°   | 25.4              | $P=0.065$ |
|                              | 30°-60°  | 39.9              |           |
|                              | 61°-90°  | 34.7              |           |
| $\rho$ (P) <sup>‡</sup>      | 0°-29°   | 53.9 <sup>§</sup> | $P<0.001$ |
|                              | 30°-60°  | 29.0              |           |
|                              | 61°-90°  | 17.1              |           |

$\chi^2$  tests whether proportions differ from random (33%-34%-33%). Only after rearrangement, the three intervals differ from random.

0°=direction of movement.

\* $n=747$ , <sup>†</sup> $n=554$ , <sup>‡</sup> $n=193$  sister pairs.

<sup>§</sup>Comparing A and P shows that in P, more cells (5%) end up in the interval close to the direction of movement (0°-29°) after the rearrangement.

The whole group of  $\vartheta$  and the whole group of  $\rho$  differ significantly in all three cases ('both', A and P) showing the impact of the rearrangements (Mann-Whitney,  $P<0.001$ ). Furthermore,  $\vartheta$  (A) differs significantly from  $\vartheta$  (P) (Mann-Whitney,  $P=0.043$ ). This difference is due to slightly differently oriented divisions of P cells with fewer cells dividing in the direction of movement. That  $\rho$  does not differ between A and P (Mann-Whitney,  $P=0.143$ ), although there are differences in division orientation, suggests that more rearrangement occurs in P (see also <sup>§</sup>).
